# Supplementary material for: Functional and structural insight into lignocellulosic fibers for high-areal-capacity lithium–sulfur batteries
Source: Royal Society of Chemistry journal article supplement (doi:10.1039/d1ta04376e), 2021-01-01
Supplement: d1ta04376e1.pdf [file d1ta04376e1.pdf]

## Electronic Supplementary Information

### Functional and structural insight into lignocellulosic fibers for high-areal-capacity lithium–sulfur batteries

Jong Hyuk Yun,<sup>a</sup> Joo-Hyung Kim,<sup>b</sup> Pitchai Ragupathy,<sup>c</sup> Dong Jun Kim<sup>d,\*</sup> and Do Kyung Kim<sup>a,\*</sup>

<sup>a</sup>Department of Materials Science and Engineering, Korea Advanced Institute of Science and Technology (KAIST), 291 Daehak-ro, Yuseong-gu, Daejeon 34141, Republic of Korea

<sup>b</sup>School of Materials Science and Engineering, Gyeongsang National University, 501 Jinjudaero, Jinju 52828, Republic of Korea

<sup>c</sup>Electrochemical Power Sources Division, Central Electrochemical Research Institute (CECRI), Karaikudi-630 003, India

<sup>d</sup>School of Chemistry, University of New South Wales, Sydney, NSW 2052, Australia

\* Corresponding authors.

*E-mail addresses:* [dongjun.kim@unsw.edu.au](mailto:dongjun.kim@unsw.edu.au) (D. J. Kim), [dkkim@kaist.ac.kr](mailto:dkkim@kaist.ac.kr) (D. K. Kim)

**Table S1.** Assignments of Fourier-transform infrared spectroscopy (FT-IR) peaks. The raw hemp fiber, degummed hemp fiber, and hydrothermally carbonized hemp fiber.

| Wavenumber (cm <sup>-1</sup> ) | Chemical structure                      | References |
|--------------------------------|-----------------------------------------|------------|
| 3338                           | O-H                                     | 44, 45     |
| 2917                           | C-H                                     | 44, 45     |
| 1701                           | Non-conjugated carbonyl (C=O)           | 44         |
| 1633                           | Conjugated C=O                          | 46         |
| 1610, 1508                     | Aromatic ring                           | 45–47      |
| 1380                           | C-C, C-H of syringyl (S) unit in lignin | 46, 48     |
| 1211                           | C-C, C-O of guaiacyl (G) unit in lignin | 46, 49     |
| 1025                           | Cellulose                               | 48         |
| 834                            | p-hydroxyphenyl (H) unit in lignin      | 46         |

**Table S2.** The  $I_D/I_G$  ratio of Raman spectroscopy. The  $I_D/I_G$  ratio of C400-Hemp, C500-Hemp, C600-Hemp, C700-Hemp, and C800-Hemp, calculated from Raman spectroscopy.

| <b>Sample</b>    | <b><math>I_D/I_G</math> ratio</b> |
|------------------|-----------------------------------|
| <b>C400-Hemp</b> | 0.686                             |
| <b>C500-Hemp</b> | 0.741                             |
| <b>C600-Hemp</b> | 0.773                             |
| <b>C700-Hemp</b> | 0.881                             |
| <b>C800-Hemp</b> | 0.959                             |

**Table S3.**  $R_o$ ,  $R_{SEI}$ , and  $R_{ct}$  values from the fitted Nyquist plot of electrochemical impedance spectroscopy (EIS). The pristine and cycled cells were analyzed by EIS with the sulfur loading of  $5.12 \text{ mg cm}^{-2}$ .

|                                     | $R_o$ ( $\Omega$ ) | $R_{SEI}$ ( $\Omega$ ) | $R_{ct}$ ( $\Omega$ ) |
|-------------------------------------|--------------------|------------------------|-----------------------|
| <b>S-Hemp</b>                       | 4.8                | —                      | 35.0                  |
| <b>S-Hemp_cycled</b>                | 6.8                | 5.2                    | 4.7                   |
| <b>S-Hemp@VO<sub>2</sub></b>        | 4.8                | —                      | 29.0                  |
| <b>S-Hemp@VO<sub>2</sub>_cycled</b> | 6.9                | 2.7                    | 2.6                   |

**Table S4.** The current densities of the individual peaks from cyclic voltammetry. The magnitude of peak current density on each cathodic (C1, C2) and anodic (A1) peaks varying the scan rates (0.05, 0.1, 0.2, 0.3 mV s<sup>-1</sup>), obtained from CV measurement of *S*-Hemp and *S*-Hemp@VO<sub>2</sub>.

| <i>S</i> -Hemp | Peak current (mA)       | C1   | C2   | A1   |
|----------------|-------------------------|------|------|------|
|                | Scan rate               |      |      |      |
|                | 0.05 mV s <sup>-1</sup> | 1.31 | 3.04 | 3.05 |
|                | 0.1 mV s <sup>-1</sup>  | 1.94 | 4.05 | 4.75 |
|                | 0.2 mV s <sup>-1</sup>  | 2.87 | 5.26 | 6.41 |
|                | 0.3 mV s <sup>-1</sup>  | 3.57 | 6.06 | 7.60 |

  

| <i>S</i> -Hemp@VO <sub>2</sub> | Peak current (mA)       | C1   | C2   | A1   |
|--------------------------------|-------------------------|------|------|------|
|                                | Scan rate               |      |      |      |
|                                | 0.05 mV s <sup>-1</sup> | 1.61 | 3.66 | 4.12 |
|                                | 0.1 mV s <sup>-1</sup>  | 2.37 | 4.85 | 5.88 |
|                                | 0.2 mV s <sup>-1</sup>  | 3.20 | 5.98 | 7.55 |
|                                | 0.3 mV s <sup>-1</sup>  | 4.04 | 7.07 | 8.69 |

**Table S5.** Diffusivity of lithium. The diffusivity of lithium ( $\text{cm}^2 \text{s}^{-1}$ ) calculated by Randles-Sevcik equation on each cathodic (C1, C2) and anodic (A1) peaks varying the scan rates (0.05, 0.1, 0.2, 0.3  $\text{mV s}^{-1}$ ), obtained from CV measurement of *S*-Hemp and *S*-Hemp@VO<sub>2</sub>.

| <i>S</i> -Hemp | Diffusivity of Lithium<br>( $\text{cm}^2 \text{s}^{-1}$ ) | C1                    | C2                    | A1                    |
|----------------|-----------------------------------------------------------|-----------------------|-----------------------|-----------------------|
|                | Scan rate                                                 |                       |                       |                       |
|                | 0.05 $\text{mV s}^{-1}$                                   | $2.31 \times 10^{-8}$ | $1.26 \times 10^{-7}$ | $1.26 \times 10^{-7}$ |
|                | 0.1 $\text{mV s}^{-1}$                                    | $5.11 \times 10^{-8}$ | $2.23 \times 10^{-7}$ | $3.05 \times 10^{-7}$ |
|                | 0.2 $\text{mV s}^{-1}$                                    | $5.58 \times 10^{-8}$ | $3.75 \times 10^{-7}$ | $5.58 \times 10^{-7}$ |
|                | 0.3 $\text{mV s}^{-1}$                                    | $5.75 \times 10^{-8}$ | $1.66 \times 10^{-7}$ | $2.61 \times 10^{-7}$ |

  

| <i>S</i> -Hemp@VO <sub>2</sub> | Diffusivity of Lithium<br>( $\text{cm}^2 \text{s}^{-1}$ ) | C1                    | C2                    | A1                    |
|--------------------------------|-----------------------------------------------------------|-----------------------|-----------------------|-----------------------|
|                                | Scan rate                                                 |                       |                       |                       |
|                                | 0.05 $\text{mV s}^{-1}$                                   | $7.02 \times 10^{-8}$ | $3.63 \times 10^{-7}$ | $4.60 \times 10^{-7}$ |
|                                | 0.1 $\text{mV s}^{-1}$                                    | $7.61 \times 10^{-8}$ | $3.19 \times 10^{-7}$ | $4.68 \times 10^{-7}$ |
|                                | 0.2 $\text{mV s}^{-1}$                                    | $6.95 \times 10^{-8}$ | $4.86 \times 10^{-7}$ | $7.73 \times 10^{-7}$ |
|                                | 0.3 $\text{mV s}^{-1}$                                    | $7.39 \times 10^{-8}$ | $2.26 \times 10^{-7}$ | $3.42 \times 10^{-7}$ |

**Table S6.** Metrics of high-areal-capacity Li–S cell configurations based on carbonaceous fabrics as cathode materials. The mass of anode for all cells was supposed as 16.44 mg (14 mm disk, 250  $\mu\text{m}$ ), and the voltage of all cells was equalized as 2.1 V. The mass of separator was neglected.

| Ref.             | Material                     | S loading (mg $\text{cm}^{-2}$ ) | Areal capacity (mAh $\text{cm}^{-2}$ ) | Current density (mA $\text{g}^{-1}$ ) | Mass of cathode (mg) | Mass of electrolyte (mg) | Area of cathode ( $\text{cm}^2$ ) | Energy density (Wh $\text{kg}^{-1}$ ) | Power density (W $\text{kg}^{-1}$ ) |
|------------------|------------------------------|----------------------------------|----------------------------------------|---------------------------------------|----------------------|--------------------------|-----------------------------------|---------------------------------------|-------------------------------------|
| <b>This work</b> | <b>S-Hemp@VO<sub>2</sub></b> | 15.36<br>5.12                    | 14.8<br>5.8                            | 167.5<br>1675                         | 43.97<br>14.65       | 229.1<br>76.4            | 1.13                              | 121.4<br>128.2                        | 18.7<br>167.6                       |
| 25               | Stacked CNT-S paper          | 17.3                             | 15.1                                   | 83.75                                 | 43.33                | 302.3                    | 1.33                              | 116.3                                 | 8.4                                 |
| 26               | SWCNT film                   | 7.2                              | 8.63                                   | 167.5                                 | 8.47                 | 113.2                    | 1.13                              | 148.5                                 | 18.3                                |
| 29               | LRC/S@FEG                    | 10.8                             | 10.7                                   | 111.67                                | 20.22                | 970.9                    | 0.79                              | 17.5                                  | 2.5                                 |
| 30               | HCF-S                        | 16.5                             | 16.3                                   | 167.5                                 | 39.10                | 445.7                    | 1.00                              | 68.3                                  | 11.6                                |
| 31               | Layer-by-layer PCNF          | 11.4                             | 11.3                                   | 335                                   | 24.86                | 225.5                    | 0.79                              | 69.9                                  | 30.1                                |

**Table S7.** List of chemical species detected at particular wavenumbers obtained from operando Raman spectroscopy.

| Wavenumber (cm <sup>-1</sup> ) | Species                                                     | Reference |
|--------------------------------|-------------------------------------------------------------|-----------|
| 200, 445                       | S <sub>4</sub> <sup>2-</sup>                                | 64, 66    |
| 219, 477                       | S <sub>8</sub>                                              | 65        |
| 280                            | Electrolyte                                                 | 65, 66    |
| 362                            | S <sub>8</sub> <sup>2-</sup>                                | 65        |
| 390–400                        | S <sub>7</sub> <sup>n-</sup> , S <sub>8</sub> <sup>n-</sup> | 65, 66    |
| 505                            | S <sub>4</sub> <sup>-</sup>                                 | 65, 67    |
| 748                            | LiTFSI                                                      | 65, 66    |
| 575, 1024, 1127, 1171          | S <sub>2</sub> O <sub>3</sub> <sup>2-</sup>                 | 68, 69    |



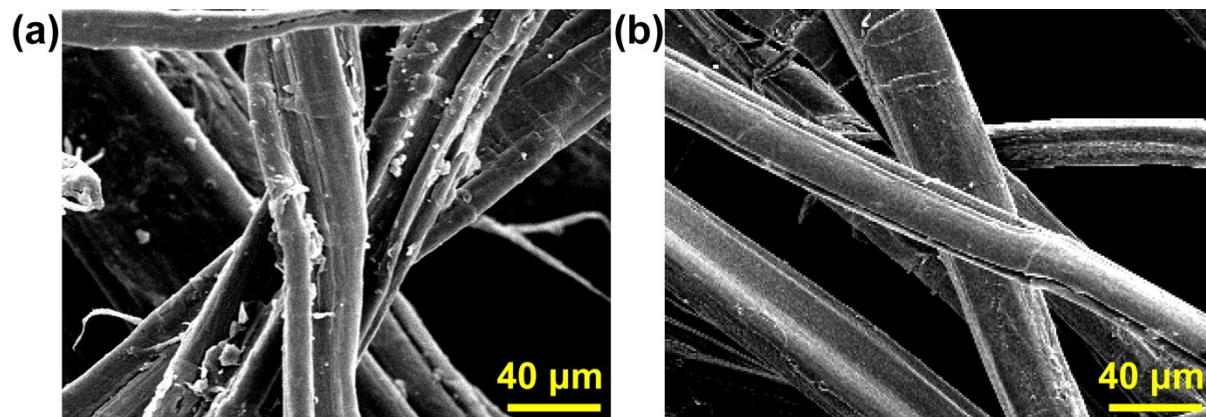

**Fig. S1.** SEM images of hemp derivatives. (a) raw hemp fiber and (b) degummed hemp fiber, demonstrating thick and smooth morphology where the bundle of internal fibers are unexposed.

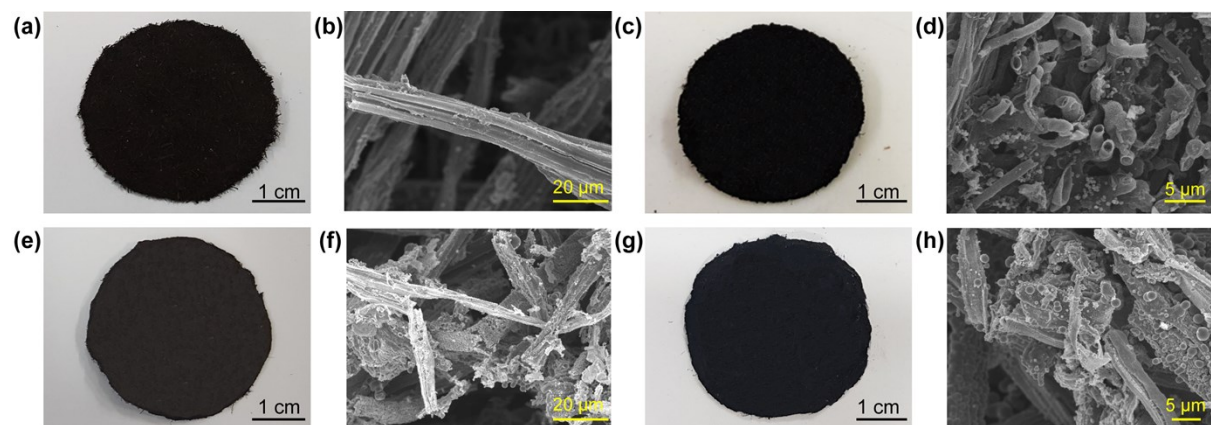

**Fig. S2.** Digital photographs and SEM images of the fabricated sheets. (a,b) hydrothermally carbonized raw-hemp fiber, (c,d) CO<sub>2</sub>-activated raw-hemp fiber, (e,f) hydrothermally carbonized degummed-hemp fiber, and (g,h) CO<sub>2</sub>-activated degummed-hemp fiber. Digital photographs show all the sheets maintain the self-stacked form. In terms of microstructure, hydrothermally carbonized raw-hemp fiber sheet demonstrates the bundle of vessels (Fig. S2b), and CO<sub>2</sub>-activated raw-hemp fiber sheet shows interwoven carbon micro-tubes split from the bundle of vessels (Fig. S2d). However, the fiber in degummed-hemp fiber sheet (Fig. S2f,h) do not maintain a rigid vascular structure both after hydrothermally carbonized and CO<sub>2</sub>-activated, due to the absence of lignin.

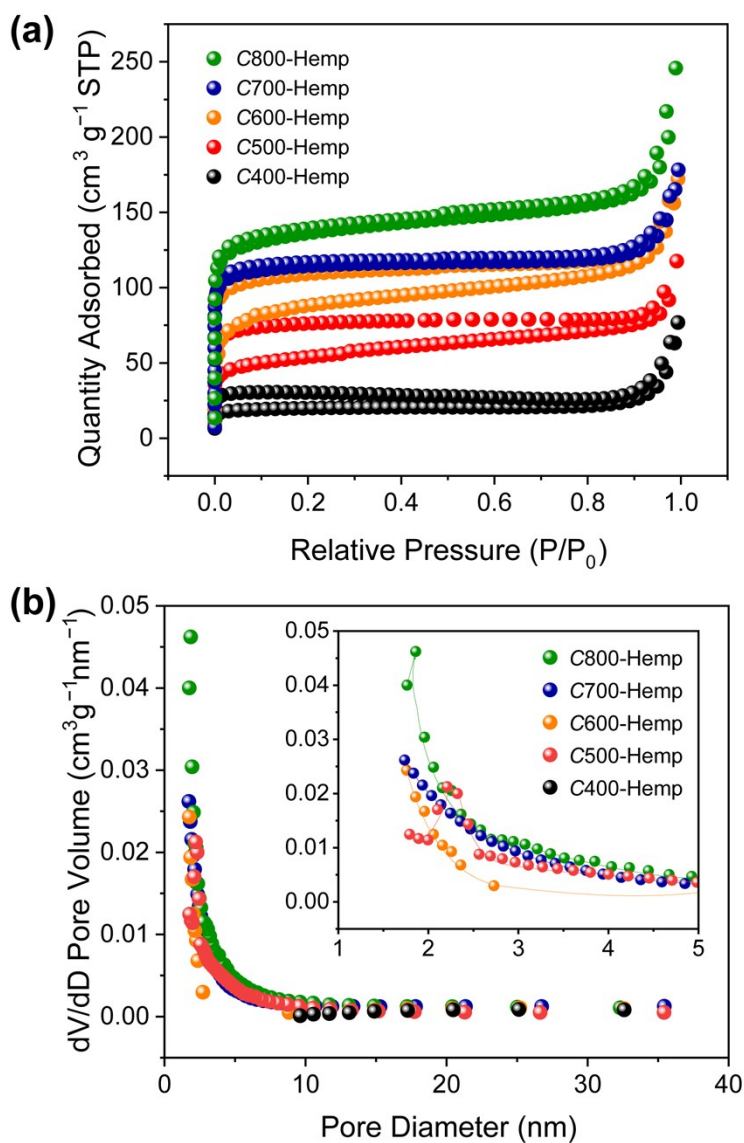

**Fig. S3.** Porosity measurement of hemp fibers. (a) BET adsorption-desorption isotherm linear plot and (b) pore distribution obtained from BJH adsorption  $dV/dD$  pore volume of  $\text{CO}_2$ -activated hemp fibers varying the temperature of 400°C, 500°C, 600°C, 700°C, and 800°C (denoted as C400-Hemp, C500-Hemp, C600-Hemp, C700-Hemp, and C800-Hemp).

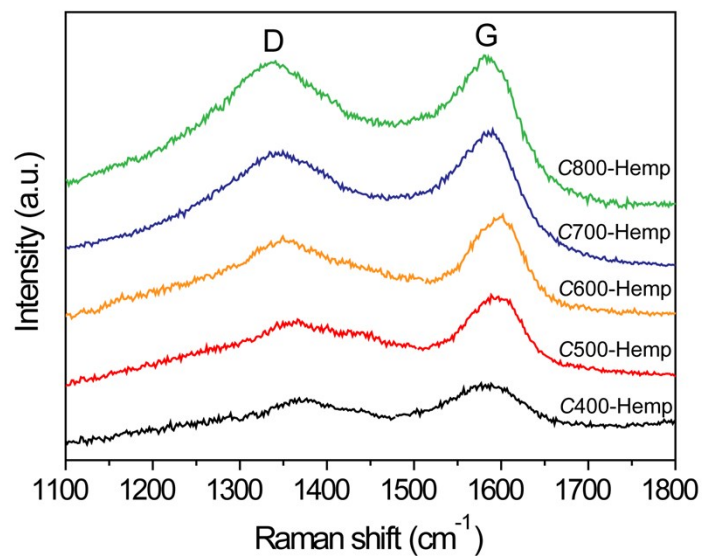

**Fig. S4.** Temperature dependent Raman spectra. The Raman spectra of C400-Hemp, C500-Hemp, C600-Hemp, C700-Hemp, and C800-Hemp.

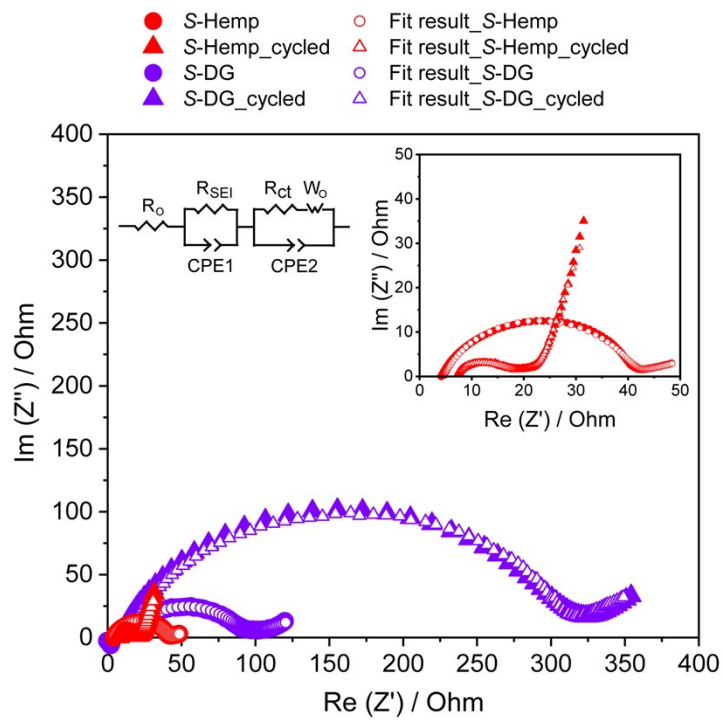

**Fig. S5.** The electrochemical impedance spectroscopy (EIS) of Li-S cell using *S*-Hemp (red symbol) and *S*-DG (purple symbol) electrodes, with the equivalent circuit described. The inset is the measured and fit result of *S*-Hemp and cycled *S*-Hemp.

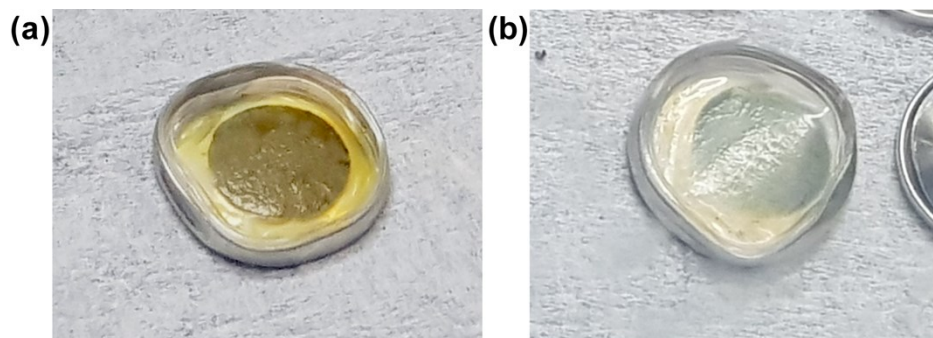

**Fig. S6.** Photographs of the disassembled Li-S coin cells. (a) The disassembled cell with *S*-DG cathode shows a yellow-dyed separator, while (b) the cell with *S*-Hemp demonstrates no color change due to the effective capturing of active materials.

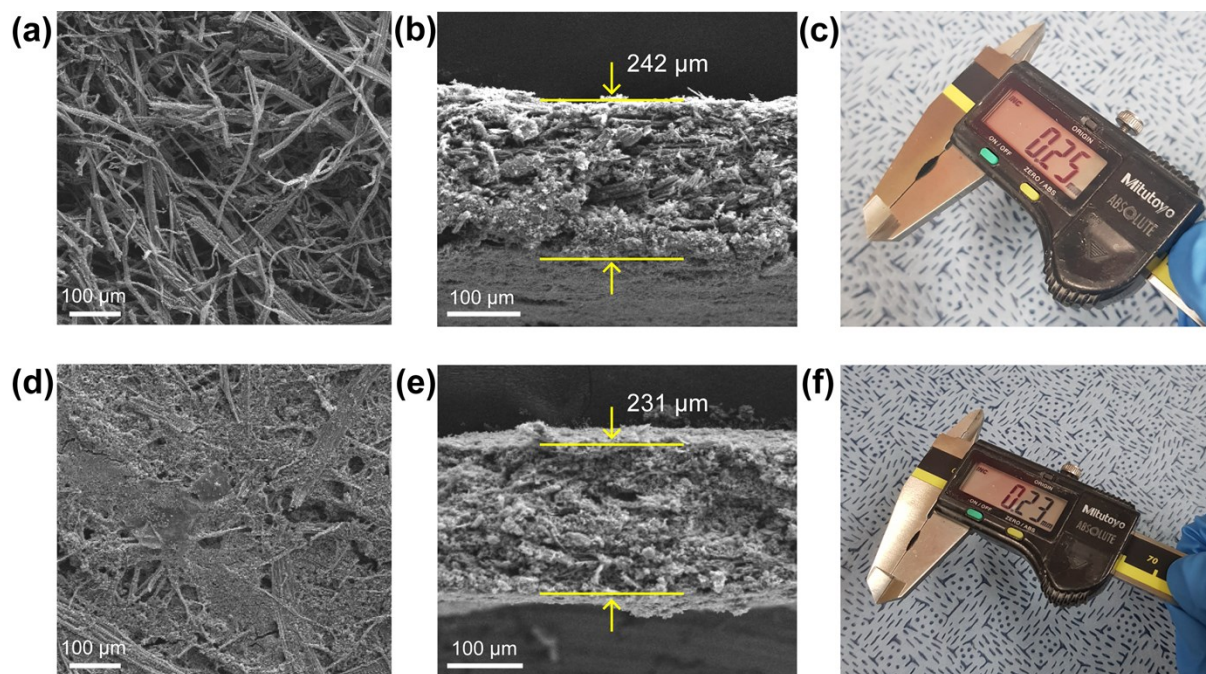

**Fig. S7.** Top- and cross-sectional view of the electrodes before and after cycling. (a) Top-view of the *C*-Hemp demonstrates the microstructure of interwoven carbon tubes. (b) Cross-sectional view of *C*-Hemp with the thickness of 242 μm. (c) Photograph of the thickness of *C*-Hemp measured by Vernier calipers. (d) Top-view of the *S*-Hemp after 50 cycles showing the void are filled with active materials. (e) Cross-sectional view of the cycled *S*-Hemp with the thickness of 231 μm. (f) Photograph of the thickness of *S*-Hemp measured by Vernier calipers.

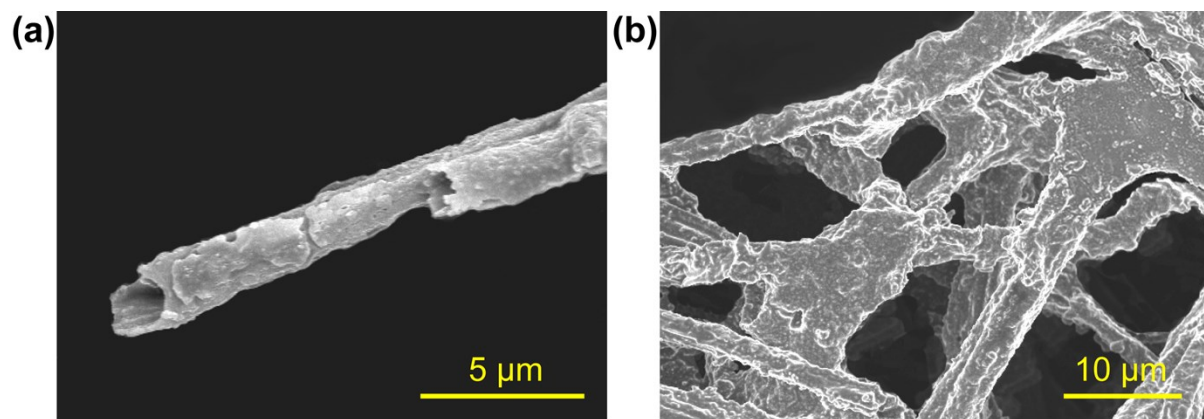

**Fig. S8.** SEM image of cycled *S*-Hemp electrode. (a) Deposition of sulfur-active material film onto the outer wall of *C*-Hemp after 5th cycling, and (b) accumulation of sulfur-active material in the interwoven space configured by the junction of fibers, as well as on the surface of the fibers, after 100th cycling.



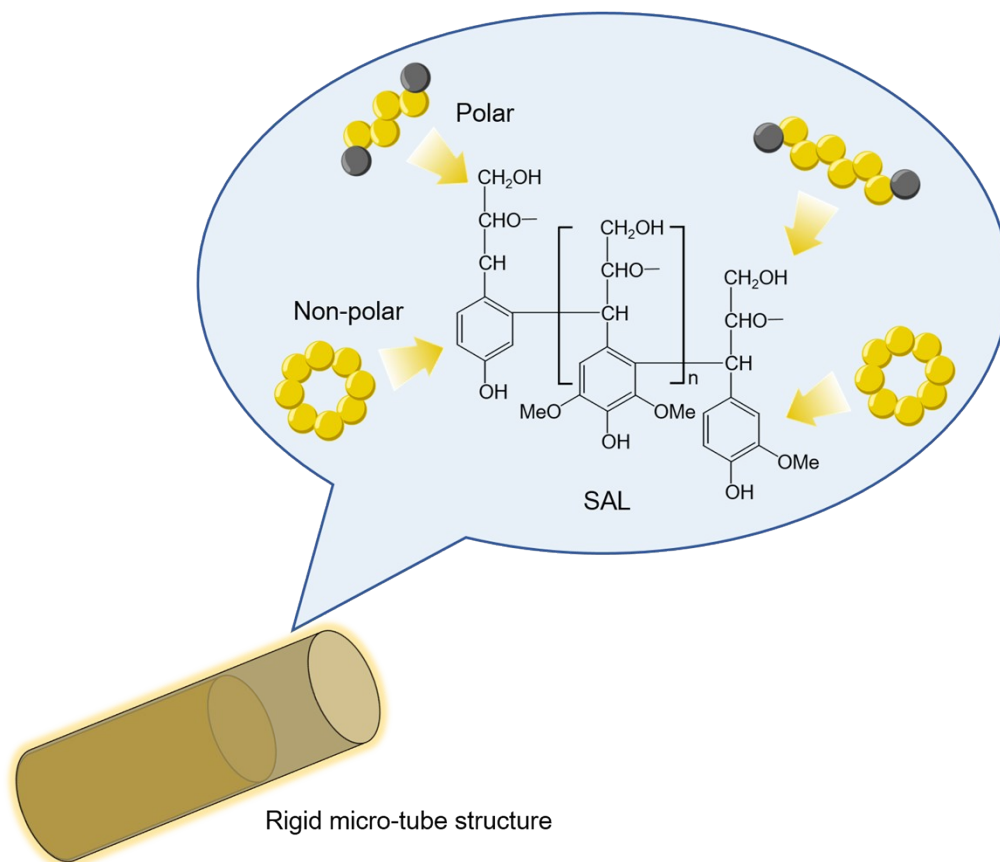

**Fig. S9.** Schematic illustration of the role of lignin in terms of structural integrity and facile utilization of active material.

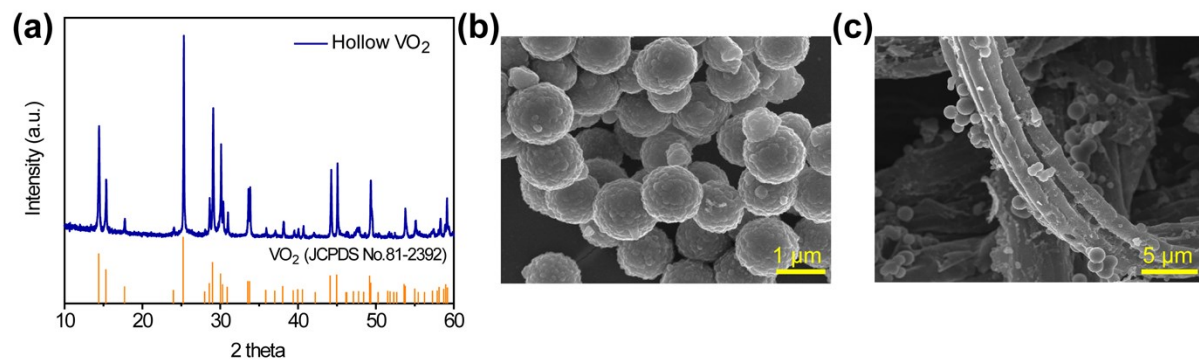

**Fig. S10.** XRD and SEM analysis of hollow VO<sub>2</sub>. (a) XRD patterns and SEM images of (b) synthesized hollow VO<sub>2</sub> spheres and (c) VO<sub>2</sub>-added *S*-Hemp electrode (*S*-Hemp@VO<sub>2</sub>).

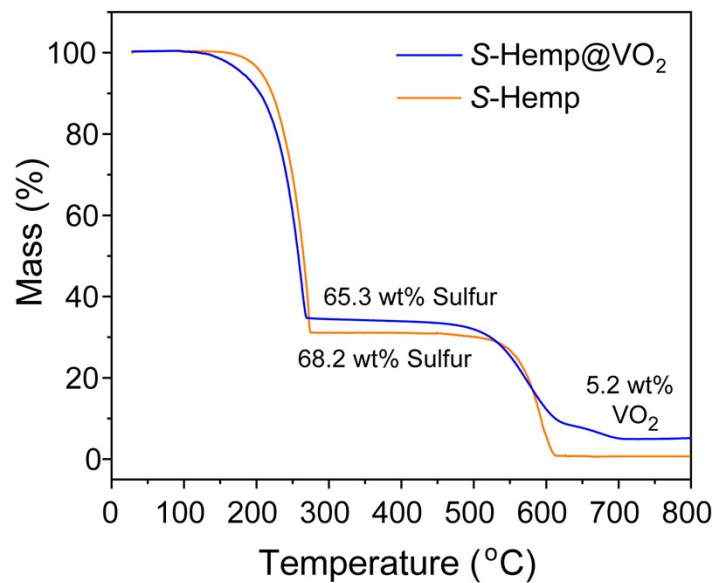

**Fig. S11.** Thermogravimetric analysis (TGA) of *S*-Hemp and *S*-Hemp@VO<sub>2</sub> electrodes.

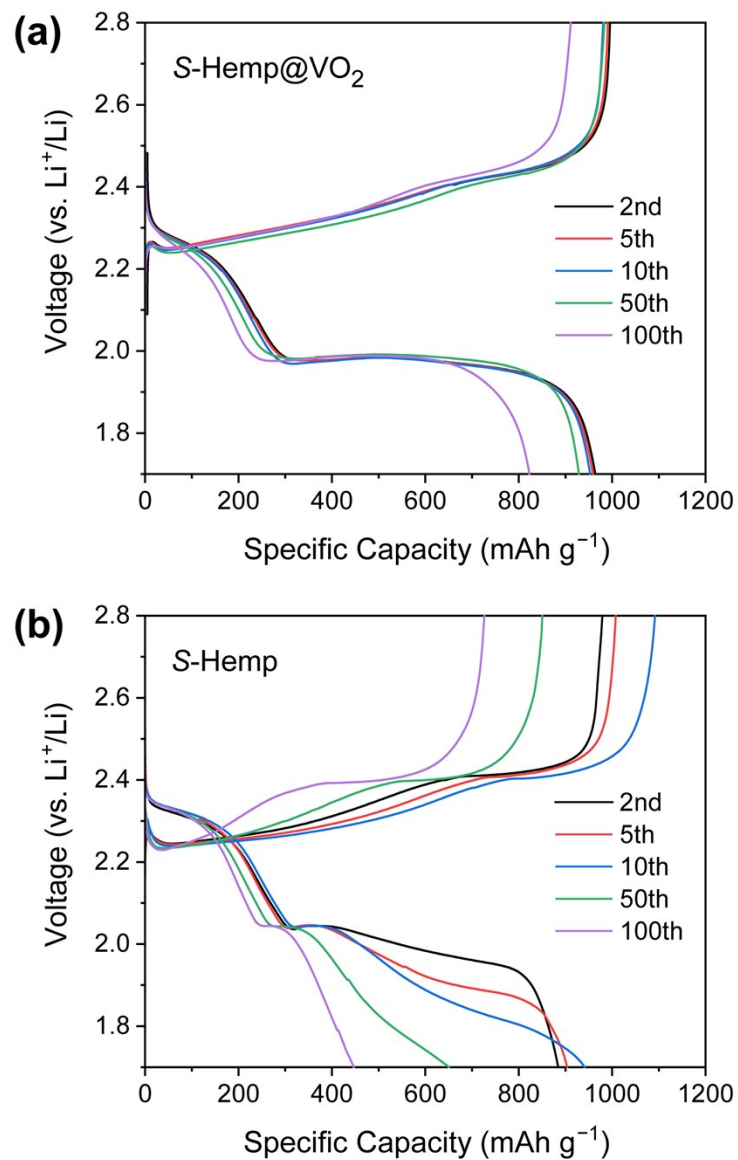

**Fig. S12.** The charge-discharge curves of the coin cell. (a) *S-Hemp@VO<sub>2</sub>* and (b) *S-Hemp* at 2nd, 5th, 10th, 50th, and 100th cycles, with a sulfur loading of 15.36 mg cm<sup>-2</sup>. (0.1 C rate)

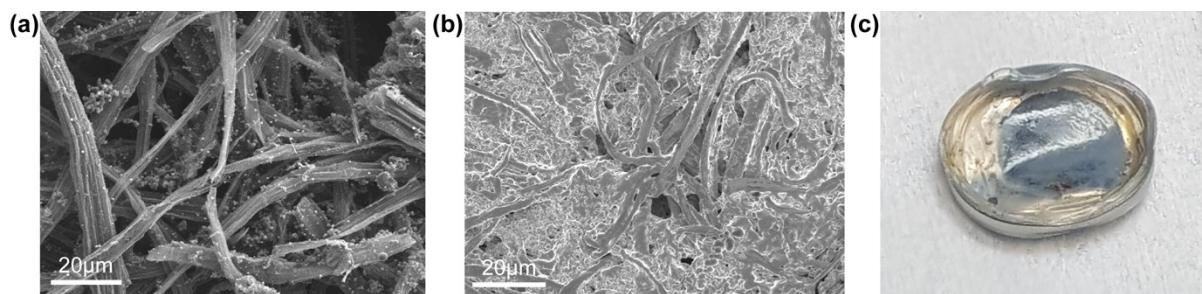

**Fig. S13.** Post-cycling characterization of the *S*-Hemp@VO<sub>2</sub> cathode. (a) Pristine *C*-Hemp@VO<sub>2</sub> cathode before cycling, demonstrating hollow VO<sub>2</sub>-decorated carbon fibers. (b) The microstructure of the *S*-Hemp@VO<sub>2</sub> cathode after 100 cycles, and (c) the photograph of a disassembled cell showing no yellow-dyeing of the separator.

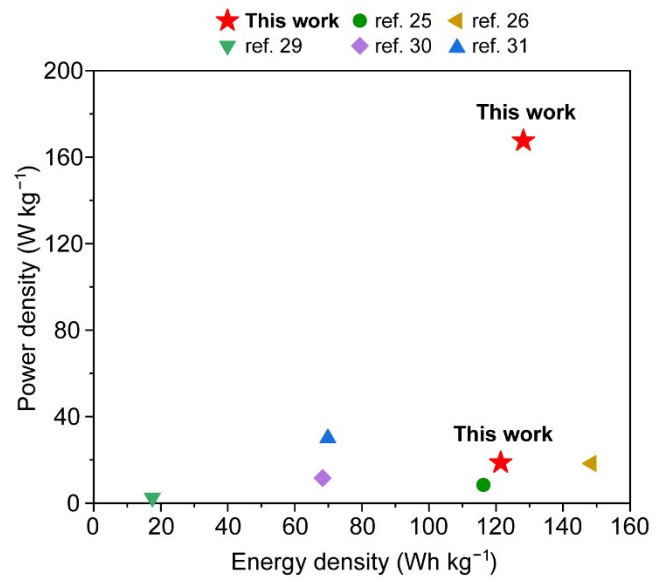

**Fig. S14.** Plots of Li-S cell performance based on carbonaceous fabrics as a function of energy density and power density. The performance metrics are listed in Table S6.

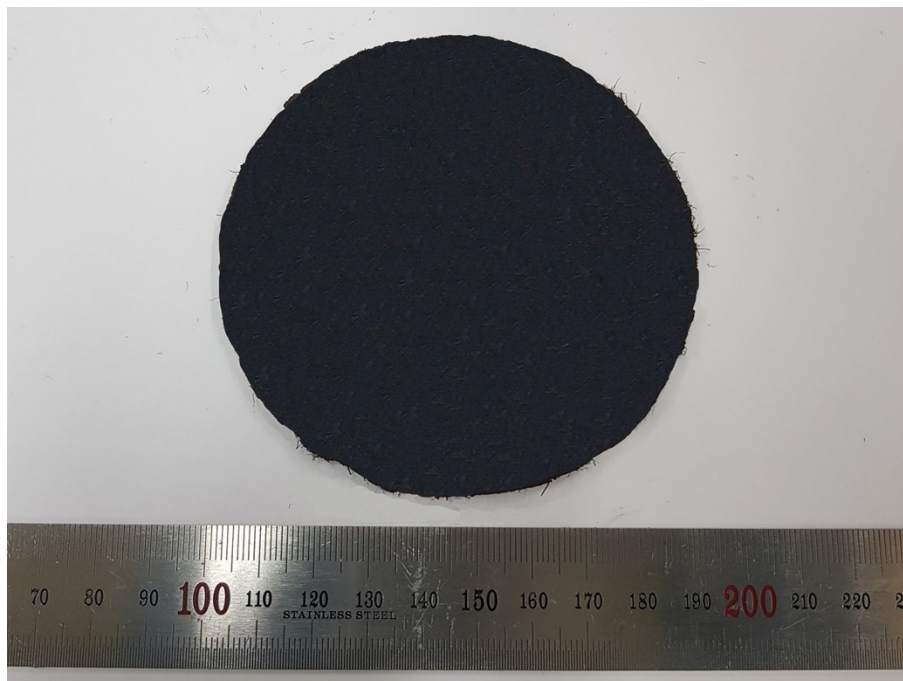

**Fig. S15.** Digital photograph of the self-assembled large-area *C*-Hemp sheet for the fabrication of pouch cell.

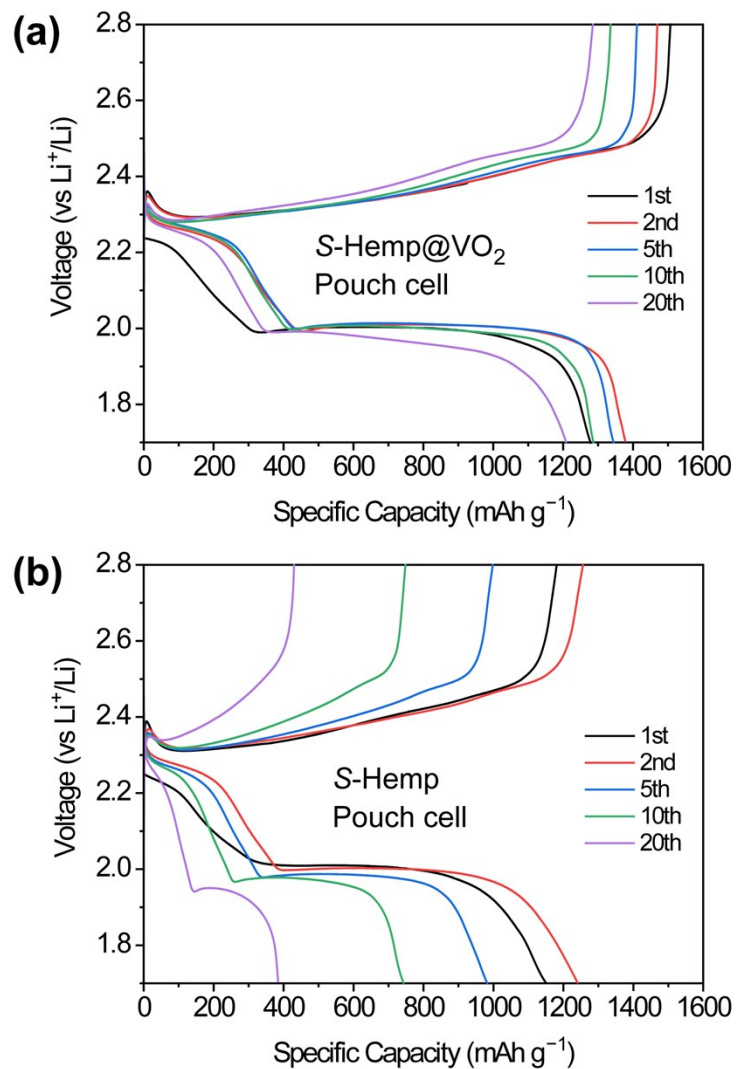

**Fig. S16.** The charge-discharge curves of the large-area (cathode area 12 cm<sup>2</sup>) pouch cell. (a) *S*-Hemp@VO<sub>2</sub> and (b) *S*-Hemp with a sulfur loading of 5.12 mg cm<sup>-2</sup> at 1st, 2nd, 5th, 10th, 20th cycles. (0.1 C rate)



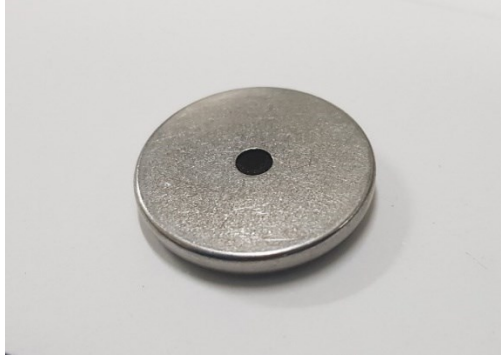

**Fig. S17.** Digital photograph of the assembled operando Raman spectroscopy cell.

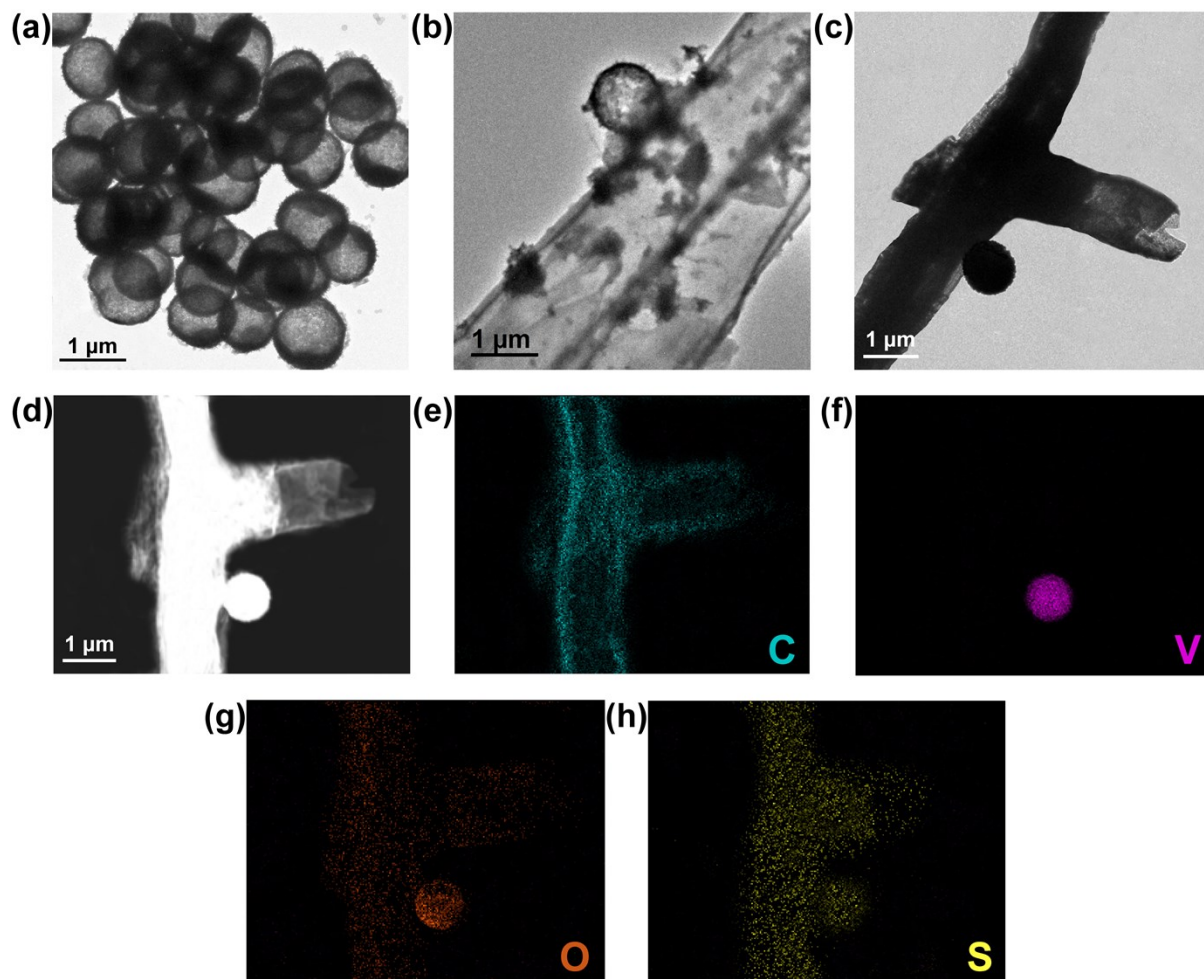

**Fig. S18.** TEM and STEM ex-situ analysis of *S*-Hemp@VO<sub>2</sub>. Transmission electron microscopy (TEM) images of (a) hollow VO<sub>2</sub> spheres, (b) *S*-Hemp@VO<sub>2</sub> before cycling, and (c) *S*-Hemp@VO<sub>2</sub> after cycling. (d) Scanning transmission electron microscopy (STEM) image of cycled *S*-Hemp@VO<sub>2</sub>, and its energy-dispersive X-ray spectroscopy (EDS) element mappings of (e) carbon, (f) vanadium, (g) oxygen, and (h) sulfur.
